# Supplementary material
Source: HighWire-hosted journal article supplement (https://jnm.snmjournals.org/highwire/filestream/110943/field_highwire_adjunct_files/0/264529_Supplemental_Data.pdf)
Supplement: 264529_Supplemental_Data.pdf [file 264529_Supplemental_Data.pdf]

**Supplemental Figure 1: STARD flow diagram**

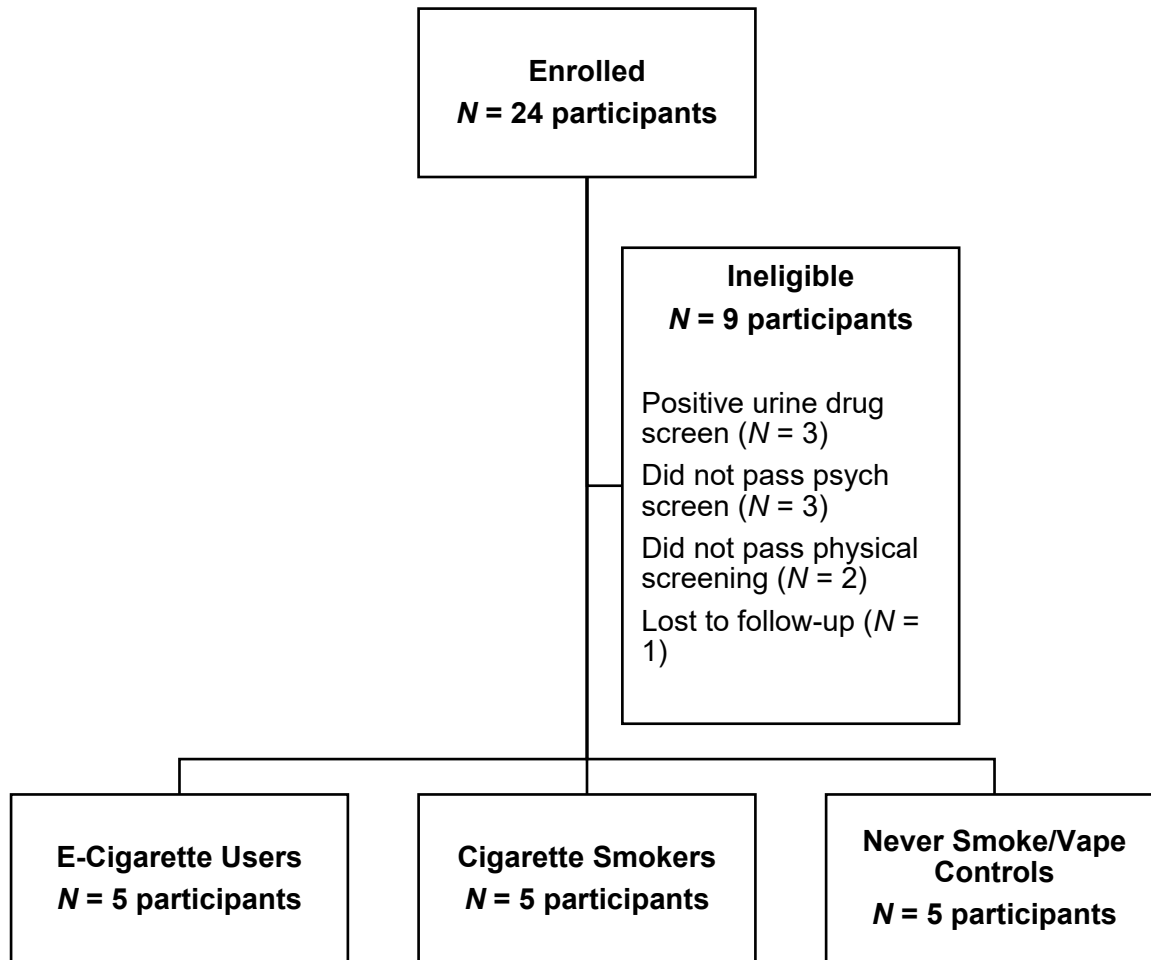

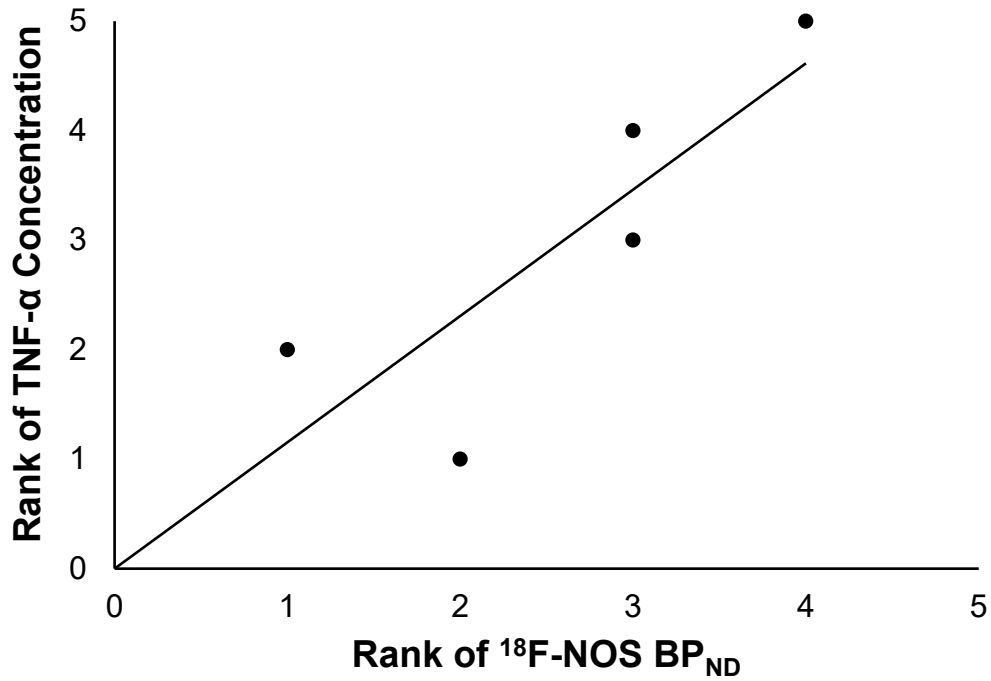

**Supplemental Figure 2.** Scatterplot demonstrating the rank-order correlation between <sup>18</sup>F-NOS non-displaceable binding potential and tumor necrosis factor-α concentration in e-cigarette users ( $r_s = 0.87$ ,  $p = 0.05$ ).

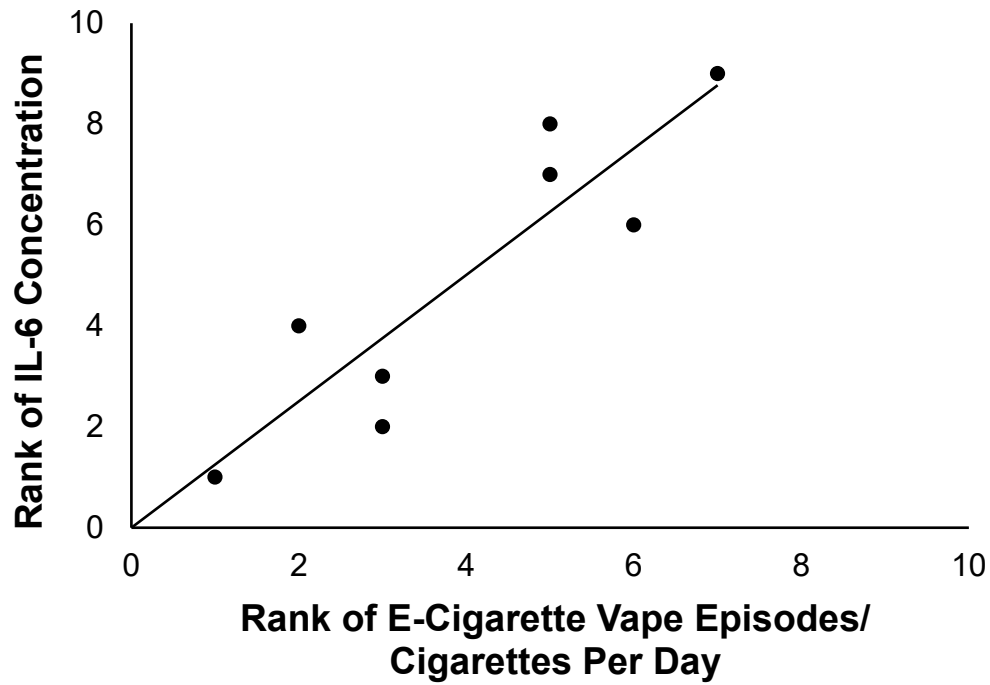

**Supplemental Figure 3.** Scatterplot demonstrating the rank-order correlation between e-cigarette vape episodes/cigarettes per day and interleukin (IL)-6 concentration in e-cigarette and combustible cigarette users ( $r_s = 0.89$ ,  $p = 0.001$ ).
